# Supplementary material for: Room Temperature Surfactant-Free Synthesis of Gold Nanoparticles in Alkaline Ethylene Glycol
Source: MDPI journal article supplement (doi:10.3390/chemistry5020061), 2023-04-14
Supplement: s1 [file s1]

Supplementary Materials for

# **Room temperature surfactant-free synthesis of gold nanoparticles in alkaline ethylene glycol**

Ditte Røjkær Rasmussen,<sup>1,†</sup> Malthe Friis Nielsen<sup>1,†</sup> and Jonathan Quinson<sup>1,\*</sup>

1) Biochemical and Chemical Engineering, Aarhus University, 40 Åbogade, 8200 Aarhus, Denmark

† These authors contributed equally to this work

\* Correspondence: jquinson@bce.au.dk

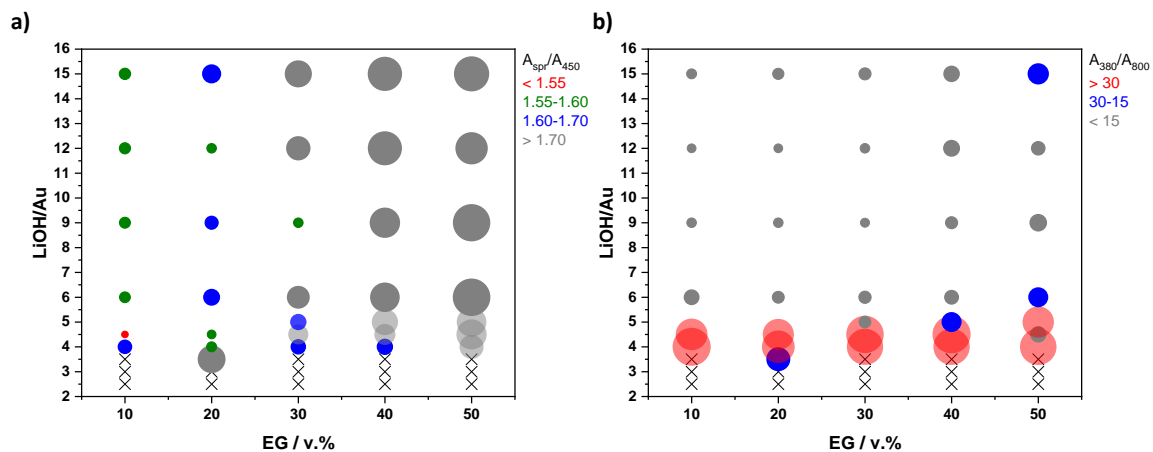

**Figure S1.  $\lambda_{spr}/A_{450}$  and  $\lambda_{380}/A_{800}$  values for the parametric study.** (a)  $\lambda_{spr}/A_{450}$  and (b)  $\lambda_{380}/A_{800}$  values for samples prepared under different synthetic conditions. The size of the data points corresponding to a given v.% of EG and LiOH/HAuCl<sub>4</sub> ratio is proportional to the (a)  $\lambda_{spr}/A_{450}$  and (b)  $\lambda_{380}/A_{800}$  values. The concentration of HAuCl<sub>4</sub> was 0.5 mM.

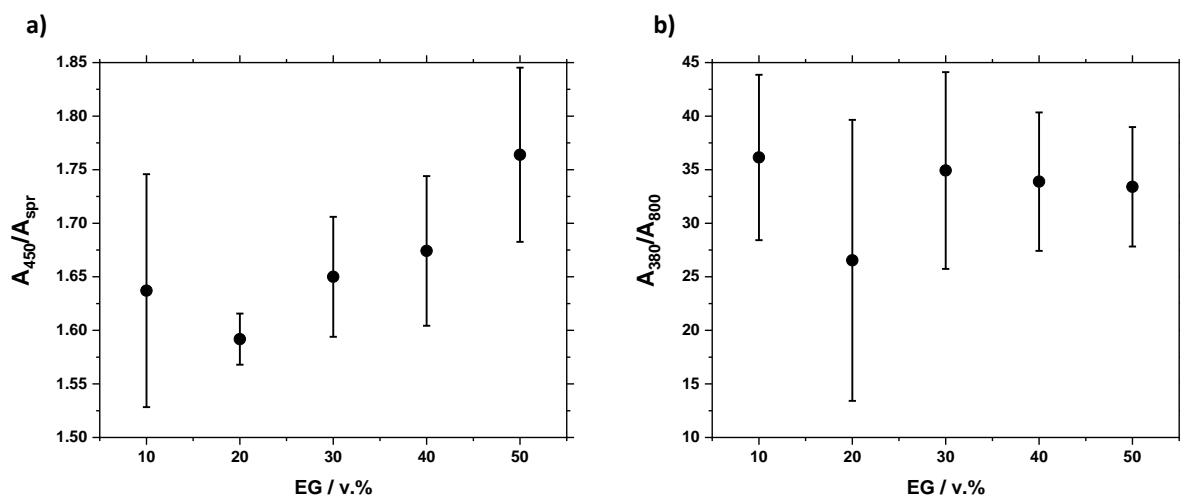

**Figure S2.  $\lambda_{450}/\lambda_{spr}$  and  $\lambda_{380}/A_{800}$  values for replicated experiments.** (a)  $\lambda_{450}/\lambda_{spr}$  and (b)  $\lambda_{380}/A_{800}$  values and standard deviations for 3 independent experiments, samples prepared for different v.% of EG as indicated and a LiOH/HAuCl<sub>4</sub> ratio of 4. The concentration of HAuCl<sub>4</sub> was 0.5 mM.

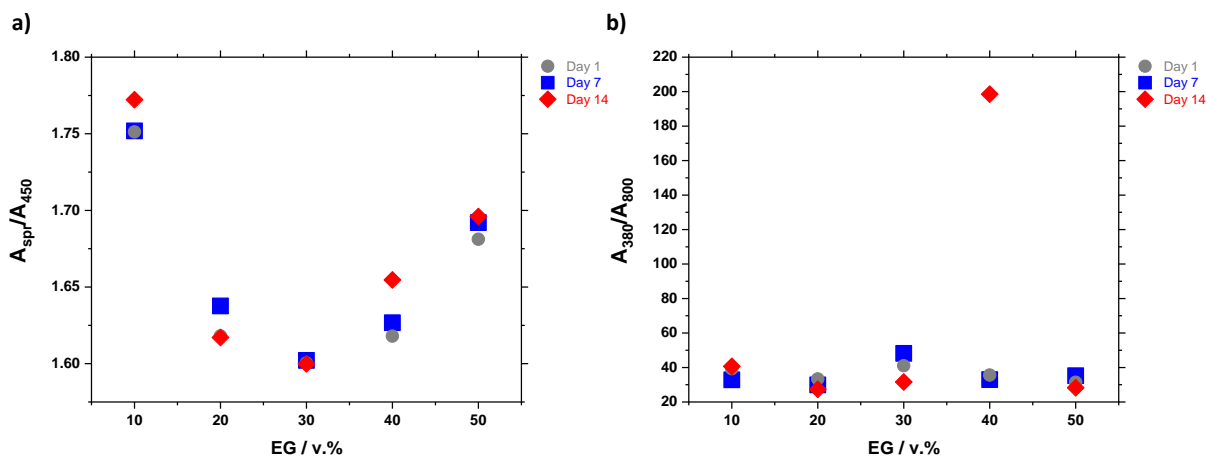

**Figure S3.  $\lambda_{spr}/A_{450}$  and  $\lambda_{380}/A_{800}$  values for time studies.** (a)  $\lambda_{spr}/A_{450}$  and (b)  $\lambda_{380}/A_{800}$  values for samples prepared for different v.% of EG as indicated and a LiOH/HAuCl<sub>4</sub> ratio of 4. The concentration of HAuCl<sub>4</sub> was 0.5 mM. The UV-vis characterization was performed 1, 7 or 14 days after synthesis, as indicated.

**Table S1.** Parameters retrieved from UV-vis analysis for all samples. The total volume was 3 mL and the final H<sub>2</sub>AuCl<sub>4</sub> concentration was 0.5 mM. For sake of clarity, the dataset discussed in Figure 2 of the main manuscript is the dataset A, the dataset discussed in Figure 3 of the main manuscript is the dataset B highlighted using bold characters, and the dataset discussed in Figure 4 of the main manuscript is highlighted using italic front style.

| Data set | Day      | EG<br>v. % | LiOH/Au  | $\lambda_{\text{spr}}$<br>nm | $\Delta\lambda/\lambda_{\text{spr}}$<br>% | $A_{650}/A_{\text{spr}}$ | $A_{380}/A_{800}$ | $A_{\text{spr}}/A_{450}$ | $A_{400}/A_{400\text{-max}}$<br>* |
|----------|----------|------------|----------|------------------------------|-------------------------------------------|--------------------------|-------------------|--------------------------|-----------------------------------|
| A        | 1        | 10         | 2.5      | X                            | X                                         | X                        | X                 | X                        | X                                 |
| A        | 1        | 10         | 3        | X                            | X                                         | X                        | X                 | X                        | X                                 |
| A        | 1        | 10         | 3.5      | X                            | X                                         | X                        | X                 | X                        | X                                 |
| A/B      | <b>1</b> | <b>10</b>  | <b>4</b> | <b>519</b>                   | <b>5.97</b>                               | <b>0.066</b>             | <b>42</b>         | <b>1.625</b>             | <b>0.90 / 0.91</b>                |
| B/C      | <b>1</b> | <b>10</b>  | <b>4</b> | <b>522</b>                   | <b>5.75</b>                               | <b>0.066</b>             | <b>39</b>         | <b>1.751</b>             | <b>0.91 / 0.95</b>                |
| C        | 7        | 10         | 4        | 522                          | 5.94                                      | 0.078                    | 33                | 1.752                    | 0.92                              |
| C        | 14       | 10         | 4        | 523                          | 5.73                                      | 0.074                    | 41                | 1.772                    | 0.91                              |
| B        | <b>1</b> | <b>10</b>  | <b>4</b> | <b>518</b>                   | <b>6.37</b>                               | <b>0.086</b>             | <b>27</b>         | <b>1.535</b>             | <b>0.49</b>                       |
| A        | 1        | 10         | 4.5      | 517                          | 6.58                                      | 0.079                    | 33                | 1.515                    | 0.55                              |
| A        | 1        | 10         | 6        | 524                          | 7.06                                      | 0.160                    | 11                | 1.583                    | 0.20                              |
| A        | 1        | 10         | 9        | 530                          | 7.17                                      | 0.273                    | 3                 | 1.588                    | 0.20                              |
| A        | 1        | 10         | 12       | 542                          | 9.78                                      | 0.553                    | 2                 | 1.589                    | 0.49                              |
| A        | 1        | 10         | 15       | 529                          | 7.56                                      | 0.298                    | 4                 | 1.594                    | 0.35                              |
| A        | 1        | 20         | 2.5      | X                            | X                                         | X                        | X                 | X                        | X                                 |
| A        | 1        | 20         | 3        | X                            | X                                         | X                        | X                 | X                        | X                                 |
| A        | 1        | 20         | 3.5      | 528                          | 6.82                                      | 0.135                    | 22                | 1.823                    | 0.93                              |
| A/B      | <b>1</b> | <b>20</b>  | <b>4</b> | <b>517</b>                   | <b>6.38</b>                               | <b>0.072</b>             | <b>35</b>         | <b>1.571</b>             | <b>0.92 / 0.93</b>                |
| B/C      | <b>1</b> | <b>20</b>  | <b>4</b> | <b>519</b>                   | <b>6.17</b>                               | <b>0.079</b>             | <b>33</b>         | <b>1.618</b>             | <b>0.94 / 0.98</b>                |
| C        | 7        | 20         | 4        | 520                          | 6.15                                      | 0.081                    | 30                | 1.638                    | 0.97                              |
| C        | 14       | 20         | 4        | 523                          | 7.08                                      | 0.166                    | 27                | 1.617                    | 0.97                              |
| B        | <b>1</b> | <b>20</b>  | <b>4</b> | <b>526</b>                   | <b>6.84</b>                               | <b>0.170</b>             | <b>11</b>         | <b>1.586</b>             | <b>0.72</b>                       |
| A        | 1        | 20         | 4.5      | 519                          | 6.36                                      | 0.080                    | 32                | 1.552                    | 0.86                              |
| A        | 1        | 20         | 6        | 529                          | 6.99                                      | 0.226                    | 7                 | 1.661                    | 0.56                              |
| A        | 1        | 20         | 9        | 532                          | 7.71                                      | 0.357                    | 3                 | 1.620                    | 0.52                              |
| A        | 1        | 20         | 12       | 538                          | 9.67                                      | 0.560                    | 2                 | 1.567                    | 0.58                              |
| A        | 1        | 20         | 15       | 538                          | 8.92                                      | 0.338                    | 6                 | 1.693                    | 0.49                              |
| A        | 1        | 30         | 2.5      | X                            | X                                         | X                        | X                 | X                        | X                                 |
| A        | 1        | 30         | 3        | X                            | X                                         | X                        | X                 | X                        | X                                 |
| A        | 1        | 30         | 3.5      | X                            | X                                         | X                        | X                 | X                        | X                                 |
| A/B      | <b>1</b> | <b>30</b>  | <b>4</b> | <b>519</b>                   | <b>6.17</b>                               | <b>0.069</b>             | <b>39</b>         | <b>1.639</b>             | <b>0.94 / 0.95</b>                |
| B/C      | <b>1</b> | <b>30</b>  | <b>4</b> | <b>519</b>                   | <b>6.17</b>                               | <b>0.070</b>             | <b>41</b>         | <b>1.600</b>             | <b>0.95 / 0.98</b>                |
| C        | 7        | 30         | 4        | 519                          | 6.17                                      | 0.070                    | 48                | 1.602                    | 0.98                              |
| C        | 14       | 30         | 4        | 520                          | 6.35                                      | 0.079                    | 32                | 1.600                    | 1.00                              |
| B        | <b>1</b> | <b>30</b>  | <b>4</b> | <b>525</b>                   | <b>6.10</b>                               | <b>0.093</b>             | <b>24</b>         | <b>1.711</b>             | <b>0.78</b>                       |
| A        | 1        | 30         | 4.5      | 523                          | 6.12                                      | 0.071                    | 41                | 1.709                    | 0.93                              |
| A        | 1        | 30         | 5        | 527                          | 6.83                                      | 0.192                    | 7                 | 1.652                    | 0.66                              |
| A        | 1        | 30         | 6        | 532                          | 6.77                                      | 0.209                    | 7                 | 1.749                    | 0.81                              |
| A        | 1        | 30         | 9        | 536                          | 10.26                                     | 0.556                    | 2                 | 1.566                    | 0.57                              |

|     |    |    |     |     |      |       |     |       |             |
|-----|----|----|-----|-----|------|-------|-----|-------|-------------|
| A   | 1  | 30 | 12  | 542 | 8.30 | 0.384 | 4   | 1.772 | 0.76        |
| A   | 1  | 30 | 15  | 540 | 7.78 | 0.261 | 7   | 1.814 | 0.86        |
| A   | 1  | 40 | 2.5 | X   | X    | X     | X   | X     | X           |
| A   | 1  | 40 | 3   | X   | X    | X     | X   | X     | X           |
| A   | 1  | 40 | 3.5 | X   | X    | X     | X   | X     | X           |
| A/B | 1  | 40 | 4   | 520 | 5.96 | 0.070 | 39  | 1.652 | 0.94 / 0.95 |
| B/C | 1  | 40 | 4   | 519 | 6.36 | 0.073 | 36  | 1.618 | 0.96 / 1.00 |
| C   | 7  | 40 | 4   | 519 | 6.36 | 0.080 | 33  | 1.627 | 0.99        |
| C   | 14 | 40 | 4   | 522 | 6.51 | 0.089 | 199 | 1.655 | 0.97        |
| B   | 1  | 40 | 4   | 525 | 6.29 | 0.090 | 27  | 1.752 | 0.94        |
| A   | 1  | 40 | 4.5 | 524 | 6.49 | 0.073 | 42  | 1.722 | 0.98        |
| A   | 1  | 40 | 5   | 530 | 6.79 | 0.132 | 17  | 1.800 | 0.97        |
| A   | 1  | 40 | 6   | 534 | 6.55 | 0.176 | 10  | 1.849 | 0.91        |
| A   | 1  | 40 | 9   | 541 | 7.39 | 0.241 | 7   | 1.860 | 0.92        |
| A   | 1  | 40 | 12  | 542 | 7.20 | 0.187 | 12  | 1.916 | 0.97        |
| A   | 1  | 40 | 15  | 542 | 7.38 | 0.189 | 12  | 1.921 | 0.96        |
| A   | 1  | 50 | 2.5 | X   | X    | X     | X   | X     | X           |
| A   | 1  | 50 | 3   | X   | X    | X     | X   | X     | X           |
| A   | 1  | 50 | 3.5 | X   | X    | X     | X   | X     | X           |
| A/B | 1  | 50 | 4   | 523 | 5.74 | 0.067 | 40  | 1.767 | 0.94 / 1.00 |
| B/C | 1  | 50 | 4   | 522 | 6.32 | 0.086 | 31  | 1.681 | 0.95 / 1.00 |
| C   | 7  | 50 | 4   | 522 | 6.51 | 0.083 | 35  | 1.692 | 0.97        |
| C   | 14 | 50 | 4   | 524 | 6.49 | 0.095 | 28  | 1.696 | 0.98        |
| B   | 1  | 50 | 4   | 530 | 6.60 | 0.088 | 29  | 1.844 | 0.96        |
| A   | 1  | 50 | 4.5 | 531 | 6.22 | 0.141 | 11  | 1.859 | 0.91        |
| A   | 1  | 50 | 5   | 532 | 6.02 | 0.082 | 32  | 1.922 | 0.99        |
| A   | 1  | 50 | 6   | 538 | 6.51 | 0.145 | 17  | 1.971 | 0.99        |
| A   | 1  | 50 | 9   | 542 | 7.01 | 0.171 | 14  | 1.968 | 0.99        |
| A   | 1  | 50 | 12  | 536 | 6.90 | 0.160 | 9   | 1.890 | 0.91        |
| A   | 1  | 50 | 15  | 539 | 7.05 | 0.130 | 18  | 1.936 | 1.00        |

\* Different  $A_{400\text{-max}}$  were used for the different datasets A, B or C.
